# Supplementary material for: Platinum complexes of curcumin delivered by dual-responsive polymeric nanoparticles improve chemotherapeutic efficacy based on the enhanced anti-metastasis activity and reduce side effects
Source: PubMed Central journal article supplement — Acta Pharm Sin B. 2019 Nov 1;10(6):1106–21. doi: 10.1016/j.apsb.2019.10.011 (PMC7332658; doi:10.1016/j.apsb.2019.10.011), 2019-11-01
Supplement: mmc1.pdf [file mmc1.pdf]

**Supporting Information for**

**Original article**

**Platinum complexes of curcumin delivered by dual-responsive polymeric nanoparticles improve chemotherapeutic efficacy based on the enhanced anti-metastasis activity and reduce side effects**

**Yan Chen<sup>a</sup>, Chen Chen<sup>a</sup>, Xiaojuan Zhang<sup>a</sup>, Chuanchuan He<sup>a</sup>, Pengxuan Zhao<sup>a</sup>, Minsi Li<sup>a</sup>, Ting Fan<sup>a</sup>, Ruicong Yan<sup>a</sup>, Yao Lu<sup>a</sup>, Robert J. Lee<sup>b</sup>, Muhammad Waseem Khan<sup>a</sup>, Muhammad Sarfraz<sup>a</sup>, Xiang Ma<sup>a,\*</sup>, Tan Yang<sup>a,\*</sup>, Guangya Xiang<sup>a,\*</sup>**

*<sup>a</sup>School of Pharmacy, Tongji Medical College, Huazhong University of Science and Technology, Wuhan 430030, China*

*<sup>b</sup>College of Pharmacy, The Ohio State University, Columbus, OH 43210, USA*

Received 13 July 2019; received in revised form 27 September 2019; accepted 21 October 2019

\*Corresponding authors. Tel./fax: +86 27 83692793.

E-mail addresses: xiangma@hust.edu.cn (Xiang Ma), yangtan0120@hust.edu.cn (Tan Yang), gyxiang1968@hotmail.com (Guangya Xiang).

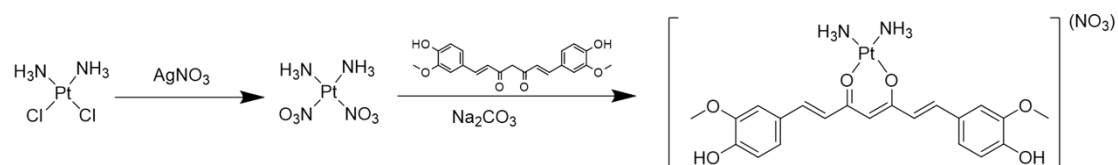

**Scheme S1** Synthetic scheme of Pt-CUR.

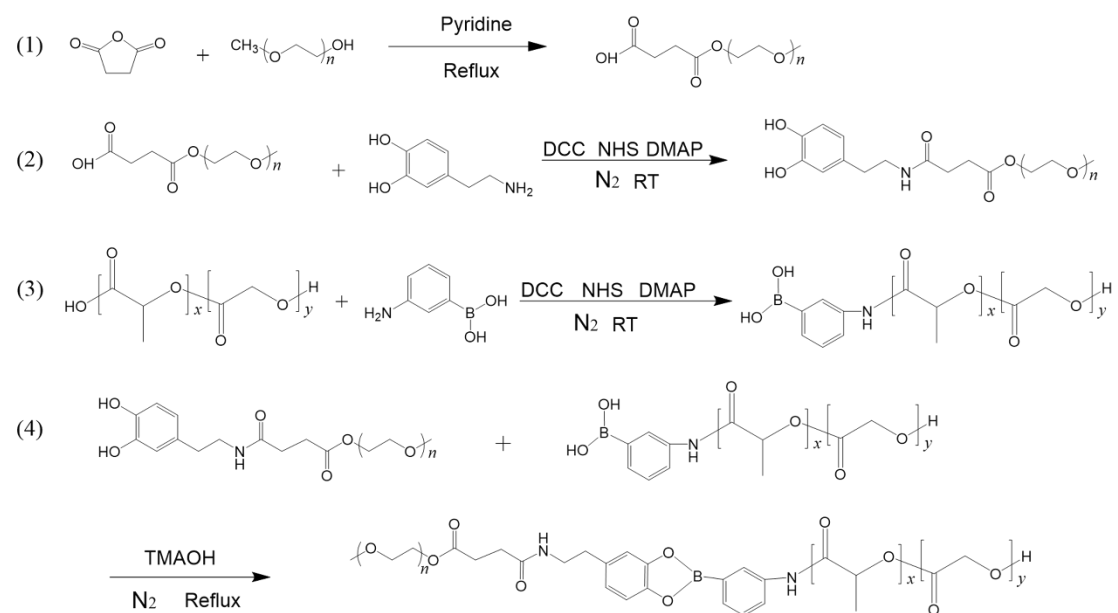

**Scheme S2** Synthetic scheme of PPP copolymer.

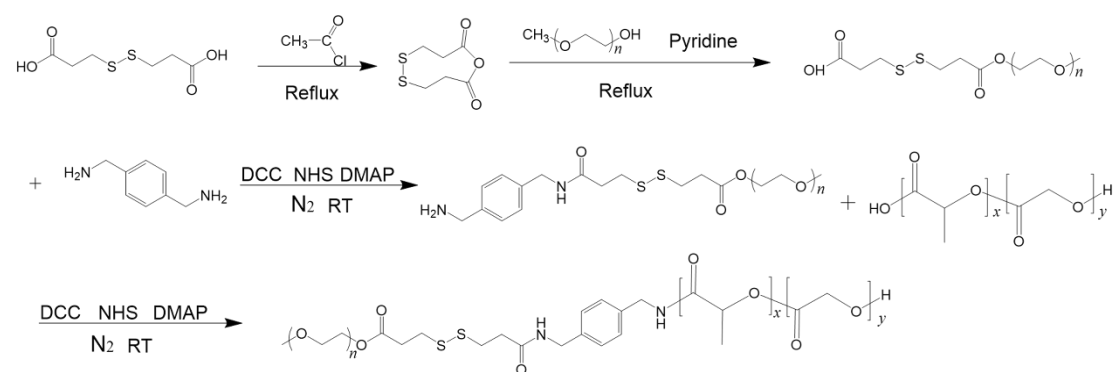

**Scheme S3** Synthetic scheme of PSP copolymer.

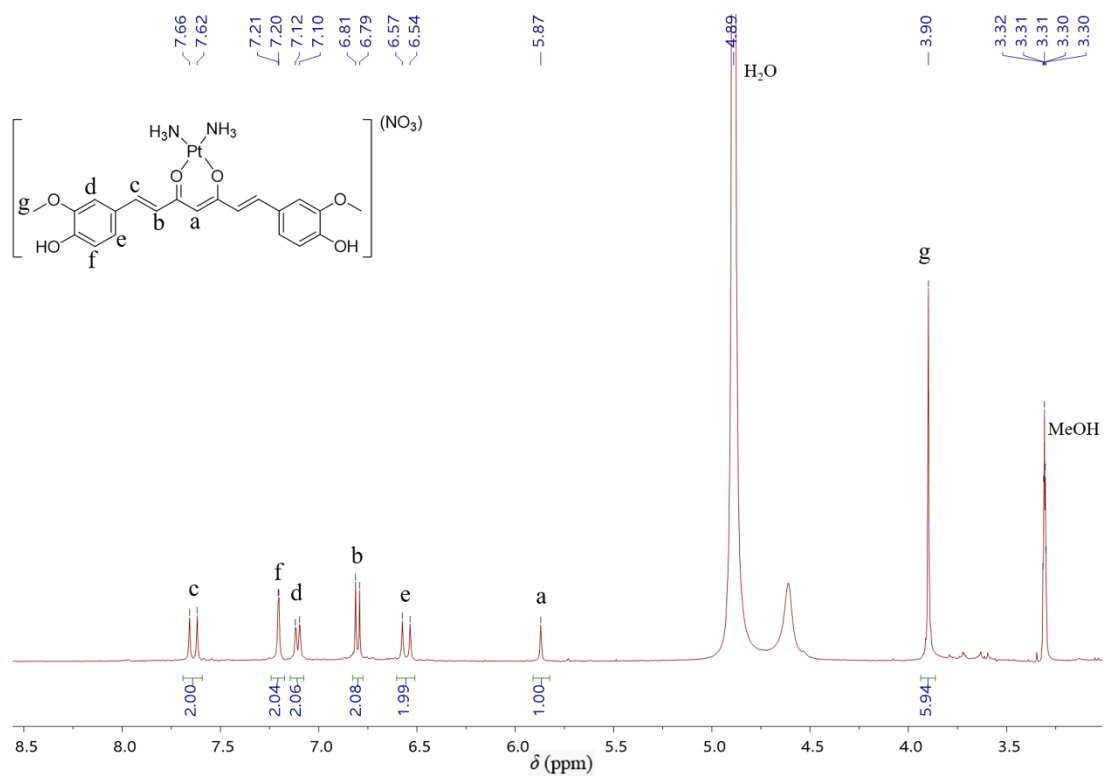

**Figure S1** <sup>1</sup>H NMR spectrum of Pt-CUR in methanol-*d*.

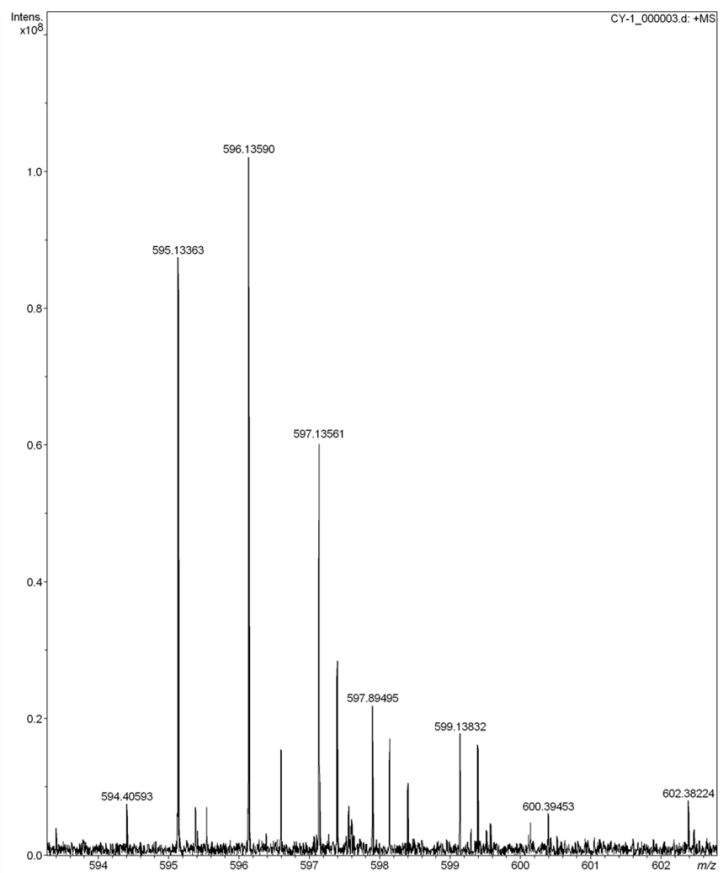

**Figure S2** ESI-MS spectrum of Pt-CUR in methanol.

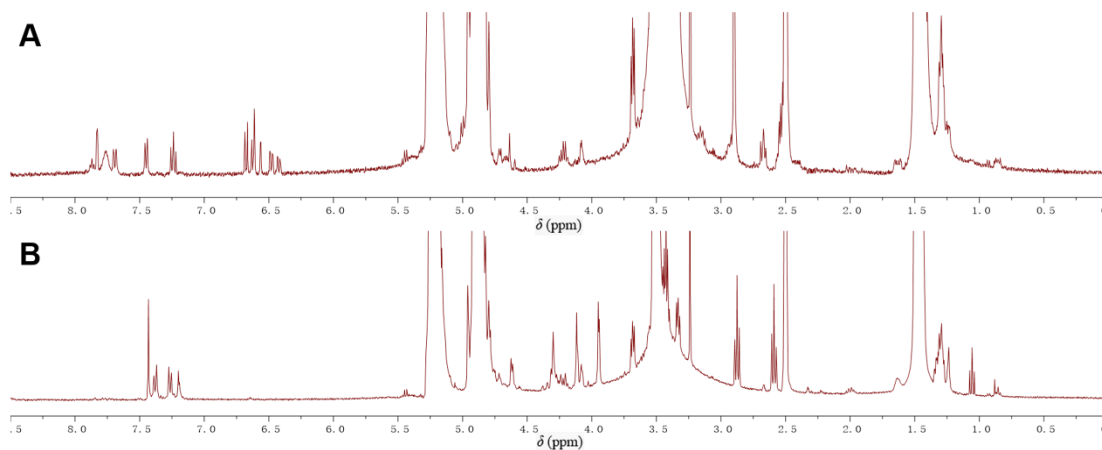

**Figure S3**  $^1\text{H}$  NMR spectra of PPP (A) and PSP copolymer (B) (solvent: dimethyl sulfoxide- $d_6$ ).

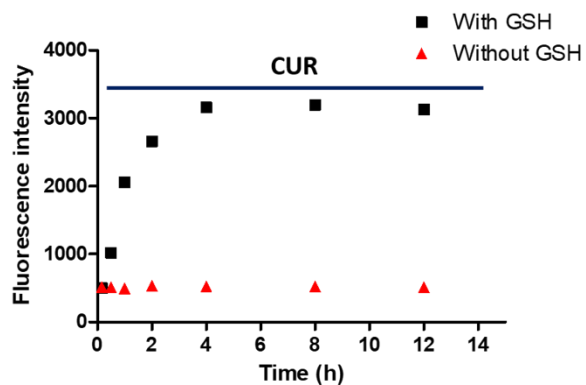

**Figure S4** The fluorescence intensity of Pt-CUR incubated with or without 10 mmol/L GSH (black line represents the fluorescence intensity of free curcumin at equimolar amount).

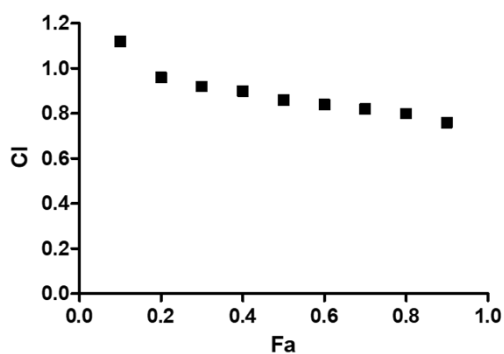

**Figure S5** The corresponding CI vs. Fa plots of combination of CDDP and CUR on A549 cells.

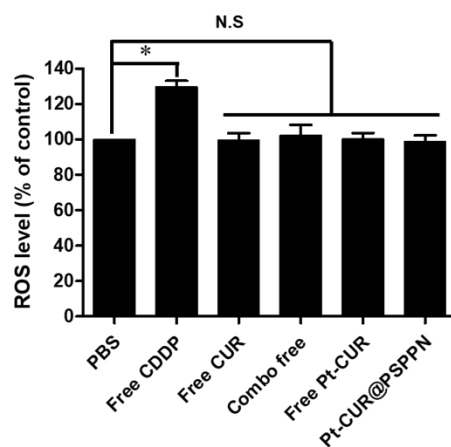

**Figure S6** Intracellular ROS level of HEK-293 cells treated with free CDDP, free CUR, combo free, free Pt-CUR and Pt-CUR@PSPPN. Data are expressed as mean $\pm$ SD ( $n=3$ ). \* $P < 0.05$ , \*\* $P < 0.01$ .

**Table S1** Physicochemical properties of Pt-CUR@PPPn and Pt-CUR@PSPN.

| Sample      | Particle size (nm) | Zeta potential (mV) | PDI               | Encapsulation efficiency (%) |
|-------------|--------------------|---------------------|-------------------|------------------------------|
| Pt-CUR@PPPn | 150.24 $\pm$ 7.54  | -19.2 $\pm$ 2.9     | 0.102 $\pm$ 0.004 | 91.0 $\pm$ 3.5               |
| Pt-CUR@PSPN | 149.63 $\pm$ 8.56  | -21.3 $\pm$ 2.6     | 0.106 $\pm$ 0.013 | 88.6 $\pm$ 4.1               |
